# Supplementary material for: P–N depleted bulk BiOBr/α-Fe2O3 heterojunctions applied for unbiased solar water splitting
Source: Royal Society of Chemistry journal article supplement (doi:10.1039/c6dt03683j), 2016-11-28
Supplement: c6dt03683j1.pdf [file c6dt03683j1.pdf]

## Supporting Information

# P-N Depleted Bulk BiOBr/ $\alpha$ -Fe<sub>2</sub>O<sub>3</sub> Heterojunctions Applied for Unbiased Solar Water Splitting

Hua-Yan Si<sup>a,b\*</sup>, Chen-Jing Mao<sup>a,b</sup>, Xiu-Guo Sun, Jin-Jin Zhao<sup>a</sup>, Na Zhou<sup>a</sup>, Wen-Jie Feng<sup>c</sup>,

Yan-Ting Li<sup>a</sup>

<sup>a</sup>School of Materials Science and Engineering, Shijiazhuang Tiedao University, Shijiazhuang 050043, China

<sup>b</sup>Hebei Provincial Key Laboratory of Traffic Engineering materials, Shijiazhuang 050043, China

<sup>c</sup> Mechanics Engineering Department, Shijiazhuang Tiedao University, Shijiazhuang 050043, China

E-mail: [dsscnewman@163.com](mailto:dsscnewman@163.com)

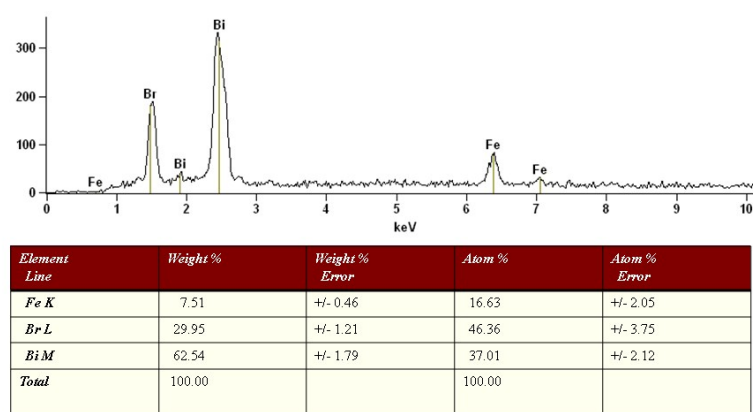

Fig. S1 The composition of BiOBr/ $\alpha$ -Fe<sub>2</sub>O<sub>3</sub> DBH architecture.

Fig. S1 The composition of BiOBr/ $\alpha$ -Fe<sub>2</sub>O<sub>3</sub> was confirmed by energy dispersive X-ray microanalysis (EDX) (Fig. S1, supporting information), which clearly showed that the elements are only Fe, Bi and Br elements, and O element was not detected attributed to its light weight.
